# Supplementary material for: Suitability of porous silicon microparticles for the long-term delivery of redox-active therapeutics
Source: Royal Society of Chemistry journal article supplement (doi:10.1039/c1cc10993f), 2011-01-01
Supplement: c1cc10993f.pdf [file c1cc10993f.pdf]

**Supplementary Figures** for “Suitability of Porous Silicon Microparticles for the Long-Term Delivery of Redox-Active Therapeutics,” Elizabeth C. Wu, Jennifer S. Andrew, Alex Buyanin, Joseph M. Kinsella, Michael J. Sailor.

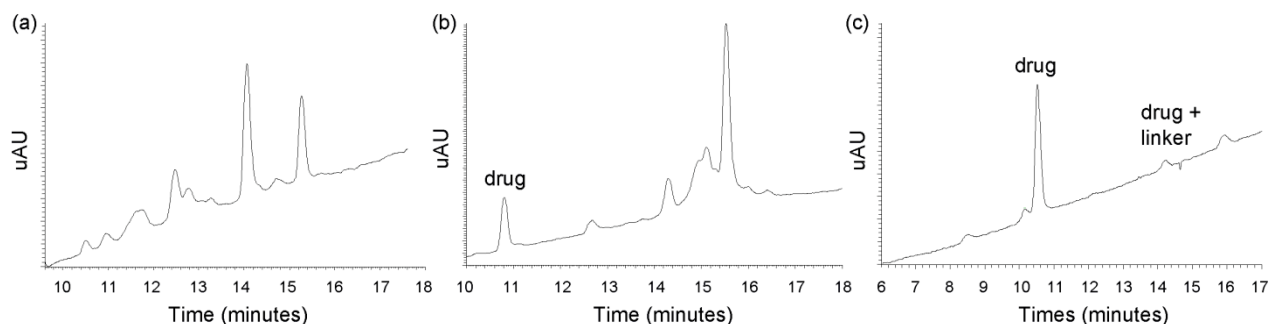

**Supplementary Fig. 1** LC traces (UV detection at 480 nm) of compounds released from: (a) hydrosilylated pSi particles; (b) hydrosilylated pSi particles air-oxidized at 150°C; (c) pSiO<sub>2</sub> particles air-oxidized at 800°C and then silanized. All particle types contained daunorubicin (“drug”) that had been coupled to the carboxylic acid group of the linker by EDC/sulfo-NHS chemistry. MS analysis on the peak labelled “drug” contained  $m/z = 528.08$ , corresponding to  $[M+H]^+$ , and  $m/z = 550.20$ , corresponding to  $[M+Na]^+$ , where M = the molecular mass of daunorubicin.

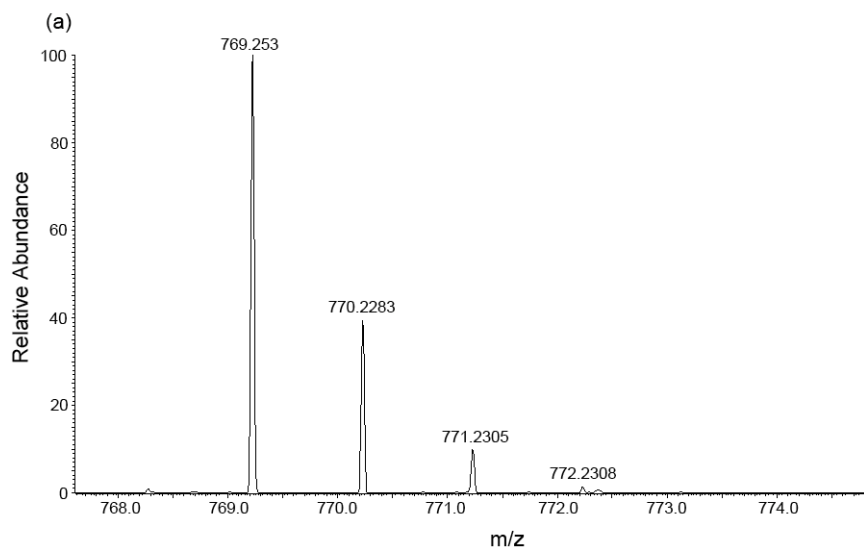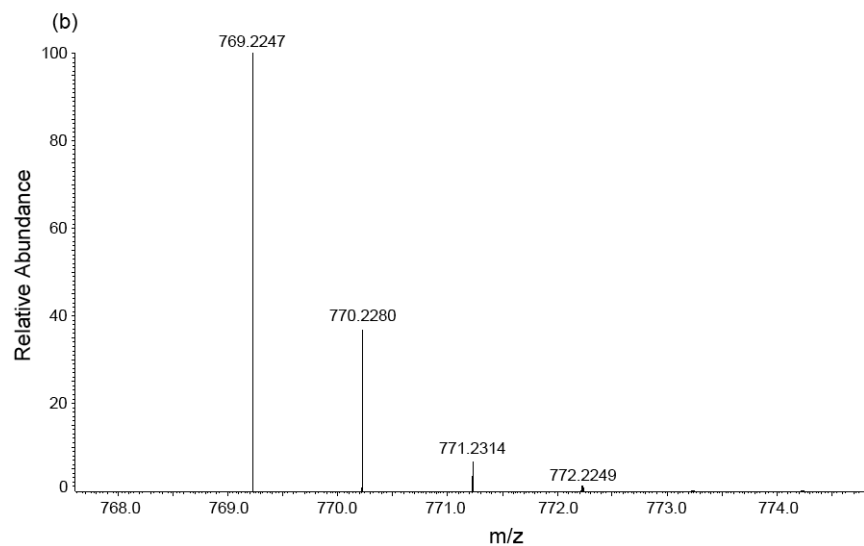

**Supplementary Fig. 2** High resolution MS of LC trace peak at 14.2 minutes of released compounds from pSiO<sub>2</sub> particles air-oxidized at 800°C and then silanized (a) and simulation of the MS of daunorubicin attached to Si through the succinic anhydride linker (b).
